# Supplementary material for: Circulating MicroRNAs in Plasma of Hepatitis B e Antigen Positive Children Reveal Liver-Specific Target Genes
Source: Hindawi journal article supplement (doi:10.1155/2014/791045), 2014-01-01
Supplement: f1 [file 791045.f1.pdf]

**Table S1. Non-liver-specific target genes with CLIP-seq overlap for 10 microRNAs predicted by two or more tools.**

| MicroRNA (hsa) | GeneName | refGene      | TargetScan | picTar | RNA22 | PITA | miRanda |
|----------------|----------|--------------|------------|--------|-------|------|---------|
| 30b-5p         | PPTC7    | NM_139283    | 3          | 3      | 0     | 3    | 0       |
|                | SOX4     | NM_003107    | 31         | 31     | 0     | 31   | 73      |
|                | NDEL1    | NM_001025579 | 86         | 0      | 0     | 86   | 86      |
|                | KLF9     | NM_001206    | 0          | 1      | 0     | 1    | 10      |
|                | QKI      | NM_206853    | 218        | 0      | 0     | 218  | 0       |
|                | FBXO45   | NM_001105573 | 7          | 0      | 0     | 7    | 0       |
|                | AZIN1    | NM_148174    | 26         | 26     | 0     | 0    | 0       |
|                | SIX4     | NM_017420    | 31         | 0      | 0     | 31   | 31      |
|                | TFDP1    | NR_026580    | 7          | 0      | 0     | 7    | 0       |
|                | RAB8A    | NM_005370    | 4          | 4      | 0     | 4    | 4       |
|                | C13orf37 | NM_001071775 | 65         | 0      | 0     | 61   | 65      |
|                | LIFR     | NM_001127671 | 148        | 0      | 0     | 148  | 0       |
|                | LRRC8D   | NM_001134479 | 3          | 0      | 0     | 3    | 0       |
|                | MLL3     | NM_170606    | 2          | 0      | 0     | 2    | 2       |
|                | B3GNT5   | NM_032047    | 5          | 5      | 0     | 5    | 7       |
|                | JAK1     | NM_002227    | 8          | 0      | 0     | 8    | 8       |
|                | SATB1    | NM_002971    | 3          | 3      | 0     | 0    | 0       |
|                | SNIP1    | NM_024700    | 0          | 0      | 2     | 0    | 2       |
|                | UBN2     | NM_173569    | 19         | 0      | 0     | 19   | 0       |
|                | OTUD4    | NM_001102653 | 7          | 0      | 0     | 7    | 0       |
|                | FOXG1    | NM_005249    | 6          | 6      | 0     | 6    | 6       |
|                | CCDC43   | NM_001099225 | 6          | 0      | 0     | 6    | 0       |
|                | CELSR3   | NM_001407    | 7          | 7      | 0     | 7    | 14      |
|                | PSMD7    | NM_002811    | 35         | 35     | 0     | 35   | 35      |
|                | SLC38A2  | NM_018976    | 2          | 2      | 0     | 2    | 2       |
|                | PTP4A1   | NM_003463    | 12         | 12     | 0     | 12   | 0       |
|                | WDR82    | NM_025222    | 7          | 0      | 0     | 7    | 0       |
|                | CHMP2B   | NM_014043    | 13         | 13     | 0     | 13   | 0       |
|                | GJA1     | NM_000165    | 5          | 5      | 0     | 5    | 5       |
|                | ZNF280B  | NM_080764    | 8          | 8      | 0     | 8    | 8       |
|                | SP4      | NM_003112    | 13         | 0      | 0     | 13   | 13      |
|                | TAOK1    | NM_020791    | 24         | 24     | 0     | 24   | 24      |
|                | NFYB     | NM_006166    | 2          | 0      | 0     | 2    | 2       |
|                | CPEB3    | NM_014912    | 3          | 3      | 0     | 3    | 3       |
|                | E2F3     | NM_001949    | 0          | 0      | 4     | 0    | 4       |
|                | COPS7B   | NM_022730    | 25         | 25     | 0     | 25   | 25      |
|                | SFRS7    | NM_001031684 | 28         | 28     | 0     | 28   | 28      |
|                | SEMA6D   | NM_153618    | 2          | 2      | 0     | 2    | 2       |
|                | TULP4    | NM_020245    | 0          | 7      | 0     | 0    | 5       |
|                | PCGF5    | NM_032373    | 6          | 6      | 0     | 6    | 6       |
|                | OTUD4    | NM_199324    | 0          | 7      | 0     | 0    | 7       |
|                | BACH1    | NM_206866    | 16         | 16     | 0     | 0    | 0       |
|                | RAP2C    | NM_021183    | 7          | 7      | 0     | 7    | 7       |
|                | ARL6IP6  | NR_024526    | 5          | 0      | 6     | 5    | 0       |
|                | CCDC43   | NM_144609    | 0          | 6      | 0     | 0    | 6       |
|                | PPP3R1   | NM_000945    | 6          | 6      | 0     | 6    | 6       |

|          |              |     |     |    |    |    |
|----------|--------------|-----|-----|----|----|----|
| PIP4K2B  | NM_003559    | 4   | 0   | 0  | 4  | 4  |
| ZNF238   | NM_205768    | 15  | 0   | 0  | 15 | 15 |
| CALU     | NM_001130674 | 4   | 0   | 0  | 4  | 0  |
| RARB     | NM_000965    | 0   | 16  | 0  | 0  | 16 |
| EDC3     | NM_001142443 | 7   | 0   | 0  | 7  | 0  |
| CBFB     | NM_001755    | 0   | 2   | 0  | 0  | 2  |
| SCAMP1   | NM_004866    | 9   | 9   | 0  | 9  | 9  |
| TBPL1    | NM_004865    | 2   | 2   | 0  | 0  | 0  |
| FLJ36031 | NM_175884    | 4   | 4   | 0  | 4  | 4  |
| GMEB2    | NM_012384    | 11  | 11  | 0  | 11 | 11 |
| ZSCAN29  | NM_152455    | 2   | 0   | 0  | 2  | 2  |
| ZNF507   | NM_014910    | 20  | 0   | 0  | 20 | 20 |
| YPEL5    | NM_016061    | 0   | 4   | 0  | 0  | 4  |
| CBX3     | NM_016587    | 11  | 0   | 0  | 11 | 0  |
| SETD5    | NM_001080517 | 7   | 0   | 0  | 7  | 8  |
| EML4     | NM_001145076 | 10  | 0   | 0  | 10 | 0  |
| PLAGL2   | NM_002657    | 6   | 0   | 0  | 6  | 6  |
| TMED2    | NM_006815    | 0   | 7   | 0  | 7  | 7  |
| KLHL28   | NM_017658    | 10  | 0   | 0  | 10 | 81 |
| GFPT2    | NM_005110    | 7   | 7   | 0  | 7  | 7  |
| KRAS     | NM_033360    | 0   | 9   | 0  | 9  | 0  |
| PLEKHO2  | NM_025201    | 2   | 0   | 0  | 2  | 2  |
| ARID3A   | NM_005224    | 3   | 3   | 0  | 0  | 3  |
| C13orf23 | NM_025138    | 12  | 12  | 12 | 12 | 12 |
| TXNDC12  | NM_015913    | 0   | 0   | 11 | 0  | 11 |
| ZBTB41   | NM_194314    | 9   | 0   | 0  | 9  | 9  |
| MKRN3    | NM_005664    | 34  | 34  | 0  | 34 | 34 |
| FRS2     | NM_006654    | 8   | 0   | 0  | 8  | 8  |
| IDH1     | NM_005896    | 10  | 10  | 0  | 0  | 0  |
| SEC24A   | NM_021982    | 0   | 0   | 7  | 7  | 7  |
| RNF44    | NM_014901    | 3   | 3   | 0  | 3  | 3  |
| TULP4    | NM_001007466 | 5   | 0   | 0  | 5  | 0  |
| AP2A1    | NM_014203    | 0   | 9   | 0  | 0  | 9  |
| EED      | NM_003797    | 12  | 12  | 0  | 12 | 6  |
| SLC6A6   | NM_003043    | 14  | 14  | 0  | 7  | 7  |
| C10orf26 | NM_001083913 | 2   | 0   | 0  | 2  | 0  |
| FAM91A1  | NM_144963    | 1   | 0   | 0  | 1  | 1  |
| KIAA0247 | NM_014734    | 3   | 0   | 0  | 3  | 3  |
| FAM160B1 | NM_020940    | 3   | 0   | 3  | 0  | 3  |
| DHX40    | NM_001166301 | 2   | 0   | 0  | 2  | 0  |
| LCLAT1   | NM_182551    | 0   | 5   | 0  | 0  | 5  |
| RARB     | NM_016152    | 16  | 16  | 0  | 16 | 0  |
| PRPF40A  | NM_017892    | 10  | 0   | 0  | 10 | 0  |
| GLCE     | NM_015554    | 1   | 7   | 0  | 7  | 1  |
| CALD1    | NM_033138    | 2   | 0   | 0  | 2  | 2  |
| PSME3    | NM_176863    | 6   | 6   | 0  | 6  | 6  |
| RAP2B    | NM_002886    | 14  | 0   | 0  | 14 | 14 |
| E2F7     | NM_203394    | 110 | 110 | 0  | 0  | 0  |
| SH2B3    | NM_005475    | 11  | 0   | 0  | 11 | 0  |
| ERLIN1   | NM_006459    | 9   | 9   | 0  | 9  | 9  |
| KIAA1211 | NM_020722    | 3   | 0   | 0  | 3  | 0  |

|          |              |    |    |   |    |     |
|----------|--------------|----|----|---|----|-----|
| XPO1     | NM_003400    | 14 | 14 | 0 | 14 | 14  |
| TMEM87A  | NM_015497    | 4  | 4  | 0 | 4  | 4   |
| STK39    | NM_013233    | 2  | 2  | 0 | 2  | 2   |
| CCNT2    | NM_058241    | 14 | 14 | 0 | 0  | 0   |
| NAA25    | NM_024953    | 2  | 12 | 0 | 2  | 12  |
| NRBP1    | NM_013392    | 0  | 0  | 0 | 1  | 1   |
| CALU     | NM_001219    | 0  | 4  | 0 | 0  | 5   |
| S100PBP  | NM_022753    | 7  | 0  | 0 | 0  | 7   |
| ARL6IP6  | NM_152522    | 0  | 5  | 0 | 0  | 6   |
| PHACTR2  | NM_001100166 | 10 | 0  | 0 | 10 | 0   |
| SYPL1    | NM_182715    | 8  | 8  | 0 | 8  | 8   |
| RAB23    | NM_183227    | 6  | 0  | 0 | 6  | 0   |
| PPP1R14C | NM_030949    | 2  | 2  | 0 | 2  | 2   |
| TMEM33   | NM_018126    | 0  | 0  | 0 | 3  | 3   |
| PHF16    | NM_014735    | 5  | 5  | 0 | 5  | 0   |
| DLG5     | NM_004747    | 2  | 2  | 0 | 0  | 0   |
| TGDS     | NM_014305    | 0  | 0  | 0 | 5  | 5   |
| RFX7     | NM_022841    | 1  | 0  | 0 | 1  | 1   |
| SNX10    | NM_013322    | 1  | 0  | 0 | 0  | 1   |
| UBE3C    | NM_014671    | 3  | 0  | 0 | 3  | 0   |
| BCOR     | NM_001123385 | 48 | 0  | 0 | 48 | 0   |
| BDP1     | NM_018429    | 7  | 0  | 0 | 0  | 7   |
| TNRC6A   | NM_014494    | 8  | 6  | 0 | 8  | 8   |
| ELMOD2   | NM_153702    | 3  | 3  | 0 | 3  | 3   |
| AP2A1    | NM_130787    | 9  | 9  | 0 | 9  | 0   |
| KPNA6    | NM_012316    | 3  | 0  | 0 | 3  | 0   |
| PFN2     | NM_002628    | 9  | 9  | 0 | 9  | 0   |
| UBE2V2   | NM_003350    | 3  | 3  | 0 | 3  | 3   |
| DDAH1    | NM_012137    | 24 | 24 | 0 | 24 | 24  |
| ODZ3     | NM_001080477 | 9  | 0  | 0 | 9  | 9   |
| MIER3    | NM_152622    | 73 | 94 | 0 | 90 | 90  |
| DDIT4    | NM_019058    | 1  | 1  | 0 | 1  | 1   |
| LMBR1L   | NM_018113    | 60 | 60 | 0 | 60 | 120 |
| SERPINE1 | NM_000602    | 1  | 1  | 0 | 1  | 0   |
| ELL      | NM_006532    | 2  | 2  | 0 | 2  | 2   |
| NEFL     | NM_006158    | 1  | 0  | 0 | 1  | 1   |
| DHX40    | NM_024612    | 0  | 2  | 0 | 0  | 2   |
| LIN28B   | NM_001004317 | 10 | 0  | 0 | 10 | 10  |
| REEP3    | NM_001001330 | 19 | 19 | 0 | 19 | 132 |
| GLCC1    | NM_138426    | 12 | 0  | 0 | 12 | 12  |
| ZDHHC21  | NM_178566    | 8  | 8  | 0 | 8  | 8   |
| NRBF2    | NM_030759    | 1  | 1  | 0 | 0  | 0   |
| PFN2     | NM_053024    | 0  | 9  | 0 | 0  | 9   |
| ZFX      | NM_003410    | 0  | 0  | 0 | 3  | 3   |
| GOLGA8B  | NM_001023567 | 0  | 0  | 0 | 2  | 2   |
| NUFIP2   | NM_020772    | 82 | 82 | 0 | 82 | 82  |
| PRKRIR   | NM_004705    | 2  | 0  | 0 | 2  | 2   |
| C1orf135 | NM_024037    | 1  | 0  | 0 | 0  | 1   |
| FRZB     | NM_001463    | 8  | 0  | 0 | 8  | 8   |
| ELOVL5   | NM_021814    | 5  | 5  | 0 | 5  | 5   |
| RAPH1    | NM_213589    | 5  | 5  | 0 | 0  | 5   |

|          |              |              |    |    |    |    |    |
|----------|--------------|--------------|----|----|----|----|----|
| ZNF711   | NM_021998    | 92           | 0  | 0  | 3  | 3  |    |
| BCOR     | NM_017745    | 0            | 48 | 0  | 0  | 48 |    |
| PDCD10   | NM_145859    | 7            | 7  | 0  | 0  | 0  |    |
| GNPDA1   | NM_005471    | 9            | 0  | 0  | 9  | 9  |    |
| PTGFRN   | NM_020440    | 46           | 46 | 0  | 0  | 23 |    |
| PIP4K2A  | NM_005028    | 16           | 16 | 0  | 16 | 16 |    |
| CBFB     | NM_022845    | 2            | 2  | 0  | 2  | 0  |    |
| CD2AP    | NM_012120    | 11           | 0  | 0  | 11 | 11 |    |
| SPEN     | NM_015001    | 44           | 44 | 0  | 10 | 10 |    |
| PAWR     | NM_002583    | 16           | 16 | 0  | 16 | 16 |    |
| KLF10    | NM_005655    | 14           | 14 | 0  | 14 | 0  |    |
| CEP350   | NM_014810    | 3            | 0  | 0  | 3  | 3  |    |
| IGF1R    | NM_000875    | 0            | 0  | 0  | 4  | 4  |    |
| RAB11A   | NM_004663    | 0            | 5  | 0  | 5  | 5  |    |
| ZBTB39   | NM_014830    | 29           | 0  | 0  | 29 | 24 |    |
| SLC16A14 | NM_152527    | 2            | 0  | 0  | 0  | 2  |    |
| SATB2    | NM_015265    | 0            | 2  | 0  | 0  | 8  |    |
| FAM104A  | NM_032837    | 21           | 0  | 0  | 21 | 21 |    |
| LCLAT1   | NM_001002257 | 5            | 5  | 0  | 5  | 0  |    |
| YTHDF3   | NM_152758    | 43           | 43 | 0  | 43 | 43 |    |
| EIF2C1   | NM_012199    | 3            | 3  | 0  | 3  | 3  |    |
| LRRC8D   | NM_018103    | 0            | 3  | 0  | 0  | 3  |    |
| MAF      | NM_001031804 | 4            | 0  | 0  | 4  | 4  |    |
| GOLGA4   | NM_001172713 | 49           | 0  | 0  | 49 | 0  |    |
| TXNDC5   | NM_001145549 | 17           | 0  | 0  | 17 | 0  |    |
| HIC2     | NM_015094    | 46           | 46 | 0  | 46 | 46 |    |
| CHD1     | NM_001270    | 26           | 0  | 0  | 26 | 26 |    |
| PHF13    | NM_153812    | 18           | 18 | 0  | 0  | 0  |    |
| CLTC     | NM_004859    | 0            | 0  | 0  | 5  | 5  |    |
| GNA13    | NM_006572    | 40           | 40 | 0  | 0  | 0  |    |
| TNRC6B   | NM_001162501 | 11           | 0  | 0  | 11 | 0  |    |
| FAM81A   | NM_152450    | 3            | 0  | 0  | 3  | 3  |    |
| 30c-5p   | ARL6IP6      | NR_024526    | 5  | 5  | 6  | 5  | 6  |
|          | C13orf23     | NM_025138    | 12 | 12 | 13 | 12 | 13 |
|          | SOX4         | NM_003107    | 31 | 31 | 0  | 31 | 31 |
|          | NDEL1        | NM_001025579 | 86 | 86 | 0  | 86 | 86 |
|          | RAB8A        | NM_005370    | 4  | 4  | 0  | 4  | 4  |
|          | LRRC8D       | NM_001134479 | 3  | 3  | 0  | 3  | 3  |
|          | B3GNT5       | NM_032047    | 5  | 5  | 0  | 5  | 5  |
|          | OTUD4        | NM_001102653 | 7  | 7  | 0  | 7  | 7  |
|          | FOXG1        | NM_005249    | 6  | 6  | 0  | 6  | 6  |
|          | CCDC43       | NM_001099225 | 6  | 6  | 0  | 6  | 6  |
|          | CELSR3       | NM_001407    | 7  | 7  | 0  | 7  | 7  |
|          | PSMD7        | NM_002811    | 35 | 35 | 0  | 35 | 35 |
|          | SLC38A2      | NM_018976    | 2  | 2  | 0  | 2  | 2  |
|          | SEMA6D       | NM_153618    | 2  | 2  | 0  | 2  | 2  |
|          | GJA1         | NM_000165    | 5  | 5  | 0  | 5  | 5  |
|          | ZNF280B      | NM_080764    | 8  | 8  | 0  | 8  | 8  |
|          | TAOK1        | NM_020791    | 24 | 24 | 0  | 24 | 24 |
|          | CPEB3        | NM_014912    | 3  | 3  | 0  | 3  | 3  |
|          | COPS7B       | NM_022730    | 25 | 25 | 0  | 25 | 25 |

|          |              |    |    |   |    |     |
|----------|--------------|----|----|---|----|-----|
| SFRS7    | NM_001031684 | 28 | 28 | 0 | 28 | 28  |
| TULP4    | NM_001007466 | 5  | 5  | 0 | 5  | 5   |
| PCGF5    | NM_032373    | 6  | 6  | 0 | 6  | 6   |
| RAP2C    | NM_021183    | 7  | 7  | 0 | 7  | 7   |
| PPP3R1   | NM_000945    | 6  | 6  | 0 | 6  | 6   |
| CALU     | NM_001130674 | 4  | 4  | 0 | 4  | 5   |
| RARB     | NM_016152    | 16 | 16 | 0 | 16 | 16  |
| CBFB     | NM_022845    | 2  | 2  | 0 | 2  | 2   |
| SCAMP1   | NM_004866    | 9  | 9  | 0 | 9  | 9   |
| FLJ36031 | NM_175884    | 4  | 4  | 0 | 4  | 4   |
| GMEB2    | NM_012384    | 11 | 11 | 0 | 11 | 11  |
| PHF16    | NM_014735    | 5  | 5  | 0 | 5  | 5   |
| GFPT2    | NM_005110    | 7  | 7  | 0 | 7  | 7   |
| EED      | NM_003797    | 6  | 6  | 0 | 6  | 6   |
| MKRN3    | NM_005664    | 34 | 34 | 0 | 34 | 34  |
| KLF10    | NM_005655    | 14 | 14 | 0 | 14 | 55  |
| RNF44    | NM_014901    | 3  | 3  | 0 | 3  | 3   |
| AP2A1    | NM_130787    | 9  | 9  | 0 | 9  | 9   |
| SLC6A6   | NM_003043    | 7  | 7  | 0 | 7  | 7   |
| DHX40    | NM_001166301 | 2  | 2  | 0 | 2  | 2   |
| LCLAT1   | NM_001002257 | 5  | 5  | 0 | 5  | 5   |
| GLCE     | NM_015554    | 1  | 1  | 0 | 1  | 1   |
| PSME3    | NM_176863    | 6  | 6  | 0 | 6  | 6   |
| ERLIN1   | NM_006459    | 9  | 9  | 0 | 9  | 9   |
| XPO1     | NM_003400    | 14 | 14 | 0 | 14 | 14  |
| TMEM87A  | NM_015497    | 4  | 4  | 0 | 4  | 4   |
| STK39    | NM_013233    | 2  | 2  | 0 | 2  | 2   |
| NAA25    | NM_024953    | 2  | 2  | 0 | 2  | 2   |
| SYPL1    | NM_182715    | 8  | 8  | 0 | 8  | 8   |
| PPP1R14C | NM_030949    | 2  | 2  | 0 | 2  | 2   |
| BCOR     | NM_001123385 | 48 | 48 | 0 | 48 | 48  |
| TNRC6A   | NM_014494    | 2  | 2  | 0 | 2  | 2   |
| TNRC6A   | NM_014494    | 4  | 4  | 0 | 4  | 4   |
| ELMOD2   | NM_153702    | 3  | 3  | 0 | 3  | 3   |
| PFN2     | NM_002628    | 9  | 9  | 0 | 9  | 9   |
| UBE2V2   | NM_003350    | 3  | 3  | 0 | 3  | 3   |
| DDAH1    | NM_012137    | 24 | 24 | 0 | 24 | 24  |
| MIER3    | NM_152622    | 73 | 73 | 0 | 73 | 73  |
| DDIT4    | NM_019058    | 1  | 1  | 0 | 1  | 1   |
| LMBR1L   | NM_018113    | 60 | 60 | 0 | 60 | 60  |
| ELL      | NM_006532    | 2  | 2  | 0 | 2  | 2   |
| REEP3    | NM_001001330 | 19 | 19 | 0 | 19 | 132 |
| ZDHHC21  | NM_178566    | 8  | 8  | 0 | 8  | 8   |
| NUFIP2   | NM_020772    | 82 | 82 | 0 | 82 | 82  |
| ELOVL5   | NM_021814    | 5  | 5  | 0 | 5  | 5   |
| PIP4K2A  | NM_005028    | 16 | 16 | 0 | 16 | 16  |
| SPEN     | NM_015001    | 10 | 10 | 0 | 10 | 10  |
| PAWR     | NM_002583    | 16 | 16 | 0 | 16 | 16  |
| YTHDF3   | NM_152758    | 43 | 43 | 0 | 43 | 43  |
| EIF2C1   | NM_012199    | 3  | 3  | 0 | 3  | 3   |
| HIC2     | NM_015094    | 46 | 46 | 0 | 46 | 46  |

|          |              |     |    |   |     |     |
|----------|--------------|-----|----|---|-----|-----|
| PPTC7    | NM_139283    | 3   | 3  | 0 | 3   | 0   |
| PTP4A1   | NM_003463    | 12  | 12 | 0 | 12  | 0   |
| CHMP2B   | NM_014043    | 13  | 13 | 0 | 13  | 0   |
| EDC3     | NM_001142443 | 7   | 7  | 0 | 7   | 0   |
| EML4     | NM_001145076 | 10  | 10 | 0 | 10  | 0   |
| EED      | NM_003797    | 6   | 6  | 0 | 6   | 0   |
| SERPINE1 | NM_000602    | 1   | 1  | 0 | 1   | 0   |
| GOLGA4   | NM_001172713 | 49  | 49 | 0 | 49  | 0   |
| ARID3A   | NM_005224    | 3   | 3  | 0 | 0   | 3   |
| RAPH1    | NM_213589    | 5   | 5  | 0 | 0   | 5   |
| PTGFRN   | NM_020440    | 23  | 23 | 0 | 0   | 23  |
| AZIN1    | NM_148174    | 26  | 26 | 0 | 0   | 0   |
| SATB1    | NM_002971    | 3   | 3  | 0 | 0   | 0   |
| PDCD10   | NM_145859    | 7   | 7  | 0 | 0   | 0   |
| BACH1    | NM_206866    | 16  | 16 | 0 | 0   | 0   |
| TBPL1    | NM_004865    | 2   | 2  | 0 | 0   | 0   |
| BCL11A   | NM_018014    | 3   | 3  | 0 | 0   | 0   |
| IDH1     | NM_005896    | 10  | 10 | 0 | 0   | 0   |
| SLC6A6   | NM_003043    | 7   | 7  | 0 | 0   | 0   |
| E2F7     | NM_203394    | 46  | 46 | 0 | 0   | 0   |
| E2F7     | NM_203394    | 64  | 64 | 0 | 0   | 0   |
| CCNT2    | NM_058241    | 14  | 14 | 0 | 0   | 0   |
| DLG5     | NM_004747    | 2   | 2  | 0 | 0   | 0   |
| NRBF2    | NM_030759    | 1   | 1  | 0 | 0   | 0   |
| PTGFRN   | NM_020440    | 23  | 23 | 0 | 0   | 0   |
| SPEN     | NM_015001    | 34  | 34 | 0 | 0   | 0   |
| PHF13    | NM_153812    | 18  | 18 | 0 | 0   | 0   |
| GNA13    | NM_006572    | 40  | 40 | 0 | 0   | 0   |
| FAM160B1 | NM_020940    | 3   | 0  | 3 | 0   | 3   |
| LIFR     | NM_001127671 | 148 | 0  | 0 | 148 | 148 |
| QKI      | NM_206853    | 218 | 0  | 0 | 218 | 218 |
| SIX4     | NM_017420    | 31  | 0  | 0 | 31  | 31  |
| TFDP1    | NR_026580    | 7   | 0  | 0 | 7   | 7   |
| C13orf37 | NM_001071775 | 61  | 0  | 0 | 61  | 61  |
| MLL3     | NM_170606    | 2   | 0  | 0 | 2   | 2   |
| JAK1     | NM_002227    | 8   | 0  | 0 | 8   | 8   |
| TNRC6B   | NM_001162501 | 3   | 0  | 0 | 3   | 3   |
| TNRC6B   | NM_001162501 | 8   | 0  | 0 | 8   | 8   |
| CBX3     | NM_016587    | 11  | 0  | 0 | 11  | 11  |
| SP4      | NM_003112    | 13  | 0  | 0 | 13  | 13  |
| NFYB     | NM_006166    | 2   | 0  | 0 | 2   | 2   |
| PIP4K2B  | NM_003559    | 4   | 0  | 0 | 4   | 4   |
| ZNF238   | NM_205768    | 15  | 0  | 0 | 15  | 15  |
| ZSCAN29  | NM_152455    | 2   | 0  | 0 | 2   | 2   |
| ZNF507   | NM_014910    | 20  | 0  | 0 | 20  | 20  |
| SETD5    | NM_001080517 | 7   | 0  | 0 | 7   | 8   |
| PLAGL2   | NM_002657    | 6   | 0  | 0 | 6   | 6   |
| KLHL28   | NM_017658    | 10  | 0  | 0 | 10  | 10  |
| PLEKHO2  | NM_025201    | 2   | 0  | 0 | 2   | 2   |
| ZBTB41   | NM_194314    | 9   | 0  | 0 | 9   | 9   |
| FRS2     | NM_006654    | 8   | 0  | 0 | 8   | 8   |

|          |              |    |    |    |    |    |
|----------|--------------|----|----|----|----|----|
| C10orf26 | NM_001083913 | 2  | 0  | 0  | 2  | 2  |
| FAM91A1  | NM_144963    | 1  | 0  | 0  | 1  | 1  |
| KIAA0247 | NM_014734    | 3  | 0  | 0  | 3  | 3  |
| CALD1    | NM_033138    | 2  | 0  | 0  | 2  | 2  |
| RAP2B    | NM_002886    | 14 | 0  | 0  | 14 | 14 |
| TXNDC5   | NM_001145549 | 17 | 0  | 0  | 17 | 17 |
| PHACTR2  | NM_001100166 | 10 | 0  | 0  | 10 | 10 |
| RFX7     | NM_022841    | 1  | 0  | 0  | 1  | 1  |
| TNRC6A   | NM_014494    | 2  | 0  | 0  | 2  | 2  |
| ODZ3     | NM_001080477 | 9  | 0  | 0  | 9  | 9  |
| NEFL     | NM_006158    | 1  | 0  | 0  | 1  | 1  |
| LIN28B   | NM_001004317 | 10 | 0  | 0  | 10 | 10 |
| GLCC11   | NM_138426    | 12 | 0  | 0  | 12 | 12 |
| PRKRIR   | NM_004705    | 2  | 0  | 0  | 2  | 2  |
| FRZB     | NM_001463    | 8  | 0  | 0  | 8  | 8  |
| GNPDA1   | NM_005471    | 9  | 0  | 0  | 9  | 9  |
| CD2AP    | NM_012120    | 11 | 0  | 0  | 11 | 11 |
| CEP350   | NM_014810    | 3  | 0  | 0  | 3  | 3  |
| ZBTB39   | NM_014830    | 24 | 0  | 0  | 24 | 24 |
| FAM104A  | NM_032837    | 21 | 0  | 0  | 21 | 21 |
| MAF      | NM_001031804 | 4  | 0  | 0  | 4  | 4  |
| CHD1     | NM_001270    | 26 | 0  | 0  | 26 | 26 |
| FAM81A   | NM_152450    | 3  | 0  | 0  | 3  | 3  |
| FBXO45   | NM_001105573 | 7  | 0  | 0  | 7  | 0  |
| UBN2     | NM_173569    | 19 | 0  | 0  | 19 | 0  |
| WDR82    | NM_025222    | 7  | 0  | 0  | 7  | 0  |
| PRPF40A  | NM_017892    | 10 | 0  | 0  | 10 | 0  |
| SH2B3    | NM_005475    | 11 | 0  | 0  | 11 | 0  |
| KIAA1211 | NM_020722    | 3  | 0  | 0  | 3  | 0  |
| RAB23    | NM_183227    | 6  | 0  | 0  | 6  | 0  |
| UBE3C    | NM_014671    | 3  | 0  | 0  | 3  | 0  |
| KPNA6    | NM_012316    | 3  | 0  | 0  | 3  | 0  |
| ZBTB39   | NM_014830    | 5  | 0  | 0  | 5  | 0  |
| C13orf37 | NM_001071775 | 4  | 0  | 0  | 0  | 4  |
| S100PBP  | NM_022753    | 7  | 0  | 0  | 0  | 7  |
| SNX10    | NM_013322    | 1  | 0  | 0  | 0  | 1  |
| BDP1     | NM_018429    | 7  | 0  | 0  | 0  | 7  |
| C1orf135 | NM_024037    | 1  | 0  | 0  | 0  | 1  |
| SLC16A14 | NM_152527    | 2  | 0  | 0  | 0  | 2  |
| KLF9     | NM_001206    | 0  | 1  | 0  | 1  | 10 |
| YPEL5    | NM_016061    | 0  | 4  | 0  | 4  | 4  |
| TMED2    | NM_006815    | 0  | 7  | 0  | 7  | 7  |
| KRAS     | NM_033360    | 0  | 9  | 0  | 9  | 9  |
| MIER3    | NM_152622    | 0  | 17 | 0  | 17 | 17 |
| RAB11A   | NM_004663    | 0  | 5  | 0  | 5  | 5  |
| SATB2    | NM_015265    | 0  | 2  | 0  | 2  | 8  |
| GLCE     | NM_015554    | 0  | 6  | 0  | 6  | 0  |
| NAA25    | NM_024953    | 0  | 10 | 0  | 0  | 10 |
| LEPROTL1 | NM_001128208 | 0  | 0  | 7  | 0  | 7  |
| E2F3     | NM_001949    | 0  | 0  | 4  | 0  | 4  |
| TXNDC12  | NM_015913    | 0  | 0  | 11 | 0  | 11 |

|        |          |              |    |    |    |     |     |
|--------|----------|--------------|----|----|----|-----|-----|
|        | CAPRIN2  | NM_001002259 | 0  | 0  | 15 | 0   | 15  |
|        | SLC39A10 | NM_001127257 | 0  | 0  | 0  | 109 | 109 |
|        | SEC24A   | NM_021982    | 0  | 0  | 0  | 7   | 7   |
|        | STOX2    | NM_020225    | 0  | 0  | 0  | 8   | 8   |
|        | CCNY     | NM_145012    | 0  | 0  | 0  | 4   | 4   |
|        | NRBP1    | NM_013392    | 0  | 0  | 0  | 1   | 1   |
|        | HNRNPC   | NM_031314    | 0  | 0  | 0  | 3   | 3   |
|        | TMEM33   | NM_018126    | 0  | 0  | 0  | 3   | 3   |
|        | TGDS     | NM_014305    | 0  | 0  | 0  | 5   | 5   |
|        | ZFX      | NM_003410    | 0  | 0  | 0  | 3   | 3   |
|        | GOLGA8B  | NM_001023567 | 0  | 0  | 0  | 2   | 2   |
|        | ZNF711   | NM_021998    | 0  | 0  | 0  | 3   | 3   |
|        | IGF1R    | NM_000875    | 0  | 0  | 0  | 4   | 4   |
|        | CLTC     | NM_004859    | 0  | 0  | 0  | 5   | 5   |
| 99a-5p | MBNL1    | NM_207297    | 19 | 19 | 0  | 19  | 0   |
|        | SMARCA5  | NM_003601    | 19 | 19 | 0  | 19  | 19  |
|        | FZD8     | NM_031866    | 6  | 6  | 0  | 6   | 291 |
|        | VLDLR    | NM_003383    | 0  | 14 | 14 | 0   | 0   |
|        | TRIB2    | NR_027303    | 9  | 9  | 0  | 9   | 9   |
|        | EIF2C2   | NM_012154    | 22 | 22 | 0  | 22  | 22  |
|        | KBTBD8   | NM_032505    | 21 | 21 | 0  | 21  | 21  |
|        | ZZEF1    | NM_015113    | 2  | 2  | 0  | 2   | 2   |
|        | BAZ2A    | NM_013449    | 3  | 3  | 0  | 3   | 3   |
|        | HS3ST3B1 | NM_006041    | 6  | 6  | 0  | 6   | 6   |
| 100-5p | MBNL1    | NM_207297    | 19 | 19 | 0  | 19  | 0   |
|        | SMARCA5  | NM_003601    | 19 | 19 | 0  | 19  | 19  |
|        | FZD8     | NM_031866    | 6  | 6  | 0  | 6   | 291 |
|        | VLDLR    | NM_003383    | 0  | 14 | 14 | 0   | 0   |
|        | TRIB2    | NR_027303    | 9  | 9  | 0  | 9   | 9   |
|        | EIF2C2   | NM_012154    | 22 | 22 | 0  | 22  | 22  |
|        | KBTBD8   | NM_032505    | 21 | 21 | 0  | 21  | 21  |
|        | ZZEF1    | NM_015113    | 2  | 2  | 0  | 2   | 2   |
|        | BAZ2A    | NM_013449    | 3  | 3  | 0  | 3   | 3   |
|        | HS3ST3B1 | NM_006041    | 6  | 6  | 0  | 6   | 6   |
| 122-5p | SOX4     | NM_003107    | 0  | 0  | 31 | 0   | 31  |
|        | ZCCHC3   | NM_033089    | 0  | 0  | 5  | 0   | 5   |
|        | METTL9   | NM_001077180 | 0  | 0  | 11 | 11  | 11  |
|        | GIT1     | NM_014030    | 2  | 2  | 0  | 0   | 2   |
|        | FUBP3    | NM_003934    | 0  | 0  | 4  | 0   | 4   |
|        | CALM3    | NM_005184    | 1  | 1  | 0  | 1   | 1   |
|        | ATP1B1   | NM_001001787 | 0  | 0  | 7  | 0   | 7   |
|        | STK24    | NM_003576    | 0  | 8  | 0  | 0   | 47  |
|        | COLEC12  | NM_130386    | 0  | 0  | 8  | 0   | 8   |
|        | CPEB4    | NM_030627    | 0  | 0  | 7  | 0   | 7   |
|        | KIAA0174 | NM_014761    | 0  | 0  | 0  | 2   | 2   |
|        | TNRC6A   | NM_014494    | 0  | 34 | 0  | 34  | 34  |
|        | CCAR1    | NM_018237    | 0  | 0  | 0  | 11  | 11  |
|        | LAMC1    | NM_002293    | 2  | 2  | 0  | 2   | 2   |
|        | ABCF2    | NM_005692    | 0  | 0  | 0  | 62  | 62  |
|        | PIP4K2A  | NM_005028    | 15 | 0  | 0  | 15  | 0   |
|        | RBM47    | NM_019027    | 2  | 2  | 0  | 0   | 0   |



|        |         |              |     |     |     |    |     |
|--------|---------|--------------|-----|-----|-----|----|-----|
|        | LMNB2   | NM_032737    | 48  | 0   | 0   | 48 | 48  |
|        | RNF145  | NM_144726    | 0   | 0   | 291 | 0  | 291 |
| 192-5p | NCOA3   | NM_001174087 | 9   | 0   | 0   | 9  | 9   |
|        | DICER1  | NM_177438    | 6   | 0   | 0   | 6  | 6   |
|        | NKRF    | NM_017544    | 0   | 8   | 9   | 0  | 0   |
|        | SH3RF3  | NM_001099289 | 2   | 0   | 0   | 2  | 0   |
|        | WNK1    | NM_018979    | 5   | 0   | 0   | 5  | 0   |
|        | RICTOR  | NM_152756    | 4   | 0   | 0   | 4  | 4   |
|        | PABPC4  | NM_003819    | 12  | 0   | 0   | 12 | 0   |
| 194-5p | KPNA1   | NR_026698    | 42  | 0   | 0   | 42 | 42  |
|        | PAN3    | NM_175854    | 0   | 0   | 3   | 0  | 3   |
|        | EHBP1   | NM_015252    | 0   | 2   | 0   | 2  | 2   |
|        | PRKAR1A | NM_002734    | 3   | 0   | 3   | 3  | 3   |
|        | MIB1    | NM_020774    | 4   | 0   | 0   | 4  | 4   |
|        | CAV1    | NM_001172897 | 0   | 0   | 0   | 6  | 6   |
|        | EPC2    | NM_015630    | 11  | 11  | 0   | 11 | 11  |
|        | ZBTB10  | NM_023929    | 0   | 0   | 0   | 5  | 5   |
|        | PTBP1   | NM_031990    | 0   | 0   | 0   | 17 | 17  |
|        | FAM122B | NM_001170757 | 0   | 0   | 12  | 0  | 12  |
|        | ACVR1   | NM_001111067 | 2   | 0   | 0   | 2  | 2   |
|        | KCMF1   | NM_020122    | 2   | 2   | 0   | 0  | 0   |
|        | PAIP2   | NM_016480    | 0   | 7   | 0   | 7  | 7   |
|        | BTF3L4  | NM_001136497 | 0   | 0   | 0   | 62 | 62  |
|        | NAA50   | NM_025146    | 4   | 4   | 0   | 4  | 4   |
|        | CALU    | NM_001130674 | 0   | 0   | 0   | 13 | 13  |
|        | HOXB3   | NM_002146    | 0   | 0   | 0   | 1  | 1   |
|        | CSNK1D  | NM_139062    | 0   | 9   | 0   | 9  | 9   |
|        | SETD5   | NM_001080517 | 2   | 0   | 0   | 2  | 2   |
|        | PAXIP1  | NM_007349    | 0   | 0   | 0   | 19 | 19  |
|        | SPCS2   | NM_014752    | 7   | 7   | 0   | 7  | 7   |
|        | PURB    | NM_033224    | 0   | 0   | 0   | 3  | 3   |
|        | RASL10B | NM_033315    | 0   | 0   | 0   | 1  | 1   |
|        | PSME3   | NM_176863    | 10  | 0   | 0   | 0  | 10  |
|        | SPPL3   | NM_139015    | 0   | 0   | 0   | 4  | 4   |
|        | GIGYF1  | NM_022574    | 286 | 286 | 0   | 0  | 0   |
|        | CAPZA1  | NM_006135    | 0   | 0   | 0   | 37 | 37  |
|        | TMED5   | NR_030761    | 0   | 0   | 0   | 4  | 4   |
|        | RBM39   | NM_184234    | 0   | 0   | 0   | 3  | 3   |
|        | TSPAN3  | NM_198902    | 0   | 0   | 0   | 5  | 5   |
|        | SLK     | NM_014720    | 0   | 0   | 0   | 3  | 3   |
|        | BTBD7   | NM_001002860 | 2   | 0   | 0   | 2  | 2   |
|        | TNRC6A  | NM_014494    | 0   | 0   | 0   | 7  | 7   |
|        | SLC35F1 | NM_001029858 | 0   | 0   | 0   | 2  | 2   |
|        | PFN2    | NM_002628    | 29  | 29  | 0   | 0  | 0   |
|        | MAPK1   | NM_002745    | 10  | 0   | 0   | 10 | 0   |
|        | BMI1    | NM_005180    | 0   | 0   | 11  | 11 | 11  |
|        | BNIP2   | NM_004330    | 19  | 0   | 0   | 0  | 19  |
|        | DCAF7   | NM_005828    | 0   | 0   | 0   | 17 | 17  |
|        | DEPDC1B | NM_018369    | 2   | 2   | 0   | 2  | 0   |
|        | REV3L   | NM_002912    | 39  | 39  | 0   | 0  | 0   |
|        | MYST4   | NM_012330    | 0   | 0   | 0   | 12 | 12  |

|        |          |              |   |   |   |      |      |
|--------|----------|--------------|---|---|---|------|------|
|        | RBX1     | NM_014248    | 0 | 0 | 0 | 38   | 38   |
|        | TJAP1    | NM_001146017 | 5 | 5 | 0 | 5    | 5    |
|        | SSH2     | NM_033389    | 7 | 7 | 0 | 0    | 7    |
|        | RAB5A    | NM_004162    | 0 | 0 | 0 | 9    | 9    |
|        | AASDHPPT | NM_015423    | 0 | 0 | 0 | 10   | 10   |
| 605    | TMEM30A  | NM_018247    | 0 | 0 | 0 | 10   | 10   |
|        | ATXN1    | NM_000332    | 0 | 0 | 0 | 4    | 4    |
|        | PPP4R1   | NM_001042388 | 0 | 0 | 0 | 114  | 114  |
|        | TNRC6B   | NM_001162501 | 0 | 0 | 0 | 3    | 3    |
|        | C5orf13  | NM_001142476 | 0 | 0 | 0 | 4    | 4    |
|        | SFRS7    | NM_001031684 | 0 | 0 | 0 | 28   | 28   |
|        | QSOX2    | NM_181701    | 0 | 0 | 0 | 6    | 6    |
|        | PTGES3   | NM_006601    | 0 | 0 | 0 | 3    | 4    |
|        | CADM1    | NM_001098517 | 0 | 0 | 0 | 8    | 8    |
|        | ADIPOR2  | NM_024551    | 0 | 0 | 0 | 17   | 17   |
|        | CSNK1A1  | NM_001025105 | 0 | 0 | 0 | 27   | 27   |
|        | SMC1A    | NM_006306    | 0 | 0 | 0 | 5    | 5    |
|        | H3F3B    | NM_005324    | 0 | 0 | 0 | 10   | 10   |
|        | E2F7     | NM_203394    | 0 | 0 | 0 | 64   | 64   |
|        | RUNX1T1  | NM_175636    | 0 | 0 | 0 | 4    | 4    |
|        | ODC1     | NM_002539    | 0 | 0 | 0 | 9    | 9    |
|        | NLK      | NM_016231    | 0 | 0 | 0 | 14   | 14   |
|        | ZCCHC14  | NM_015144    | 0 | 0 | 0 | 7    | 7    |
|        | LIN28B   | NM_001004317 | 0 | 0 | 0 | 87   | 87   |
|        | ZDHHC21  | NM_178566    | 0 | 0 | 0 | 8    | 8    |
|        | PDIK1L   | NR_026685    | 0 | 0 | 0 | 3    | 4    |
|        | SCD      | NM_005063    | 0 | 0 | 0 | 1348 | 1348 |
|        | SOX9     | NM_000346    | 0 | 0 | 0 | 7    | 7    |
|        | SEC24D   | NM_014822    | 0 | 0 | 0 | 4    | 6    |
|        | BRWD1    | NM_033656    | 0 | 0 | 0 | 8    | 8    |
|        | WDR26    | NM_001115113 | 0 | 0 | 0 | 91   | 91   |
|        | ZFH3     | NM_006885    | 0 | 0 | 0 | 3    | 3    |
|        | GCLM     | NM_002061    | 0 | 0 | 0 | 8    | 8    |
|        | JHDM1D   | NM_030647    | 0 | 0 | 0 | 4    | 4    |
| 636    | MSRB3    | NM_198080    | 0 | 0 | 0 | 5    | 5    |
|        | PRKACB   | NM_002731    | 0 | 0 | 0 | 22   | 22   |
|        | LRP12    | NM_001135703 | 0 | 0 | 0 | 19   | 19   |
|        | FAM98A   | NM_015475    | 0 | 0 | 0 | 2    | 2    |
|        | ARID4B   | NM_016374    | 0 | 0 | 0 | 2    | 2    |
|        | KDM2A    | NR_027473    | 0 | 0 | 0 | 3    | 3    |
|        | CRIM1    | NM_016441    | 0 | 0 | 0 | 5    | 7    |
|        | SUZ12    | NM_015355    | 0 | 0 | 0 | 3    | 3    |
|        | SSR1     | NM_003144    | 0 | 0 | 0 | 16   | 16   |
|        | FBXO30   | NM_032145    | 0 | 0 | 0 | 30   | 30   |
|        | C10orf12 | NM_015652    | 0 | 0 | 0 | 4    | 4    |
|        | CAPZA1   | NM_006135    | 0 | 0 | 0 | 2    | 2    |
|        | ETF1     | NM_004730    | 0 | 0 | 0 | 3    | 3    |
|        | TOB1     | NM_005749    | 0 | 0 | 0 | 2    | 2    |
|        | YTHDF3   | NM_152758    | 0 | 0 | 0 | 21   | 21   |
| 885-5p | MEX3B    | NM_032246    | 0 | 0 | 0 | 1    | 5    |
|        | SIX4     | NM_017420    | 0 | 0 | 0 | 40   | 40   |

|        |              |   |   |   |     |     |
|--------|--------------|---|---|---|-----|-----|
| TUBB2B | NM_178012    | 0 | 0 | 0 | 7   | 7   |
| CREBZF | NR_028027    | 0 | 0 | 0 | 7   | 7   |
| MCL1   | NM_021960    | 0 | 0 | 0 | 5   | 5   |
| ATP1B1 | NM_001001787 | 0 | 0 | 0 | 3   | 3   |
| YWHAE  | NR_024058    | 0 | 0 | 0 | 1   | 1   |
| DAZAP2 | NM_001136264 | 0 | 0 | 0 | 25  | 25  |
| EIF4G2 | NM_001042559 | 0 | 0 | 0 | 133 | 133 |
| SYPL1  | NM_182715    | 0 | 0 | 0 | 340 | 340 |
| MIER3  | NM_152622    | 0 | 0 | 0 | 73  | 73  |
| ING3   | NM_019071    | 0 | 0 | 0 | 2   | 2   |
| IGF1R  | NM_000875    | 0 | 0 | 0 | 34  | 34  |
| YTHDF3 | NM_152758    | 0 | 0 | 0 | 4   | 4   |
| KDM6A  | NM_021140    | 0 | 0 | 0 | 8   | 8   |
| MRPS25 | NM_022497    | 0 | 0 | 0 | 29  | 29  |
| ZNF281 | NM_012482    | 0 | 0 | 0 | 2   | 3   |
| PAPD4  | NM_173797    | 0 | 0 | 0 | 17  | 17  |
| PGRMC2 | NM_006320    | 0 | 0 | 0 | 17  | 17  |
